# Supplementary material
Source: publisher figshare collection journal article supplement (https://acs.figshare.com/ndownloader/files/3773968)
Supplement: Supplementary file 1 [file 3773968]

# DMSO-treated Proteoforms

0 Ac – 0 Me

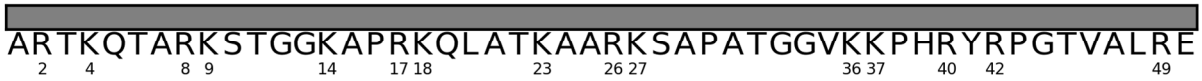

0 Ac – 1 Me

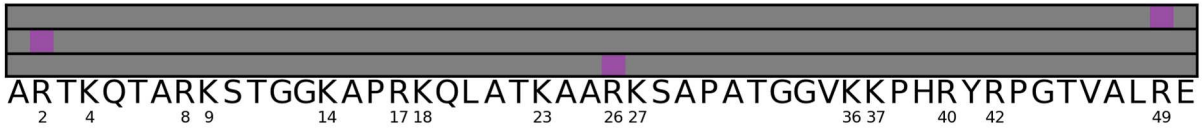

0 Ac – 2 Me

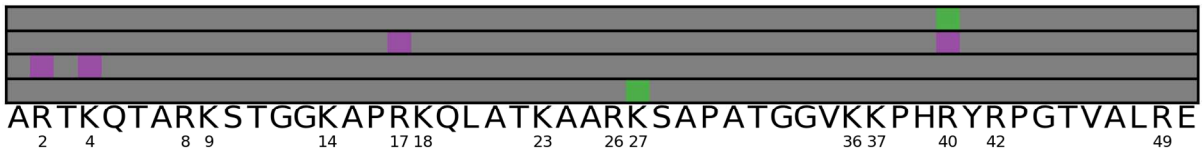

0 Ac – 3 Me

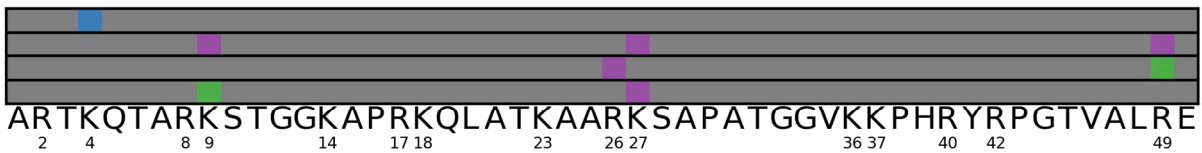

0 Ac – 4 Me

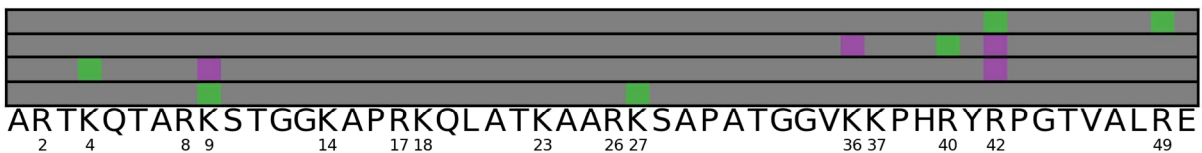

0 Ac – 5 Me

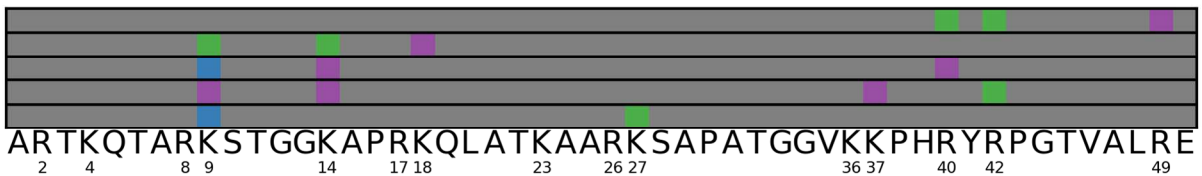

■ Acetylation
 ■ Mono-Methylation
 ■ Di-Methylation
 ■ Tri-Methylation

# DMSO-treated Proteoforms

0 Ac – 6 Me

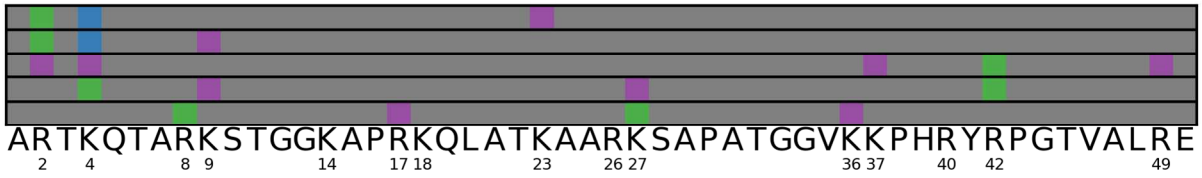

0 Ac – 7 Me

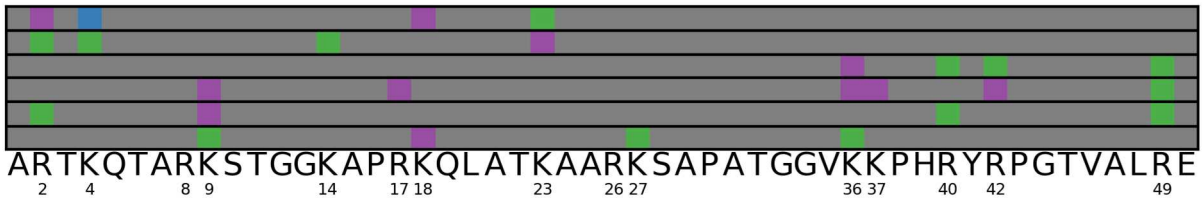

1 Ac – 0 Me

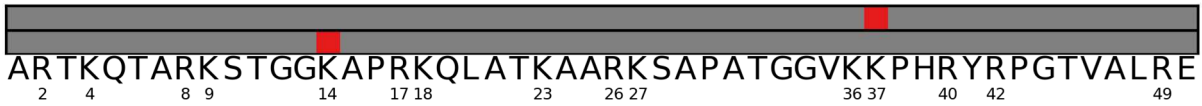

1 Ac – 1 Me

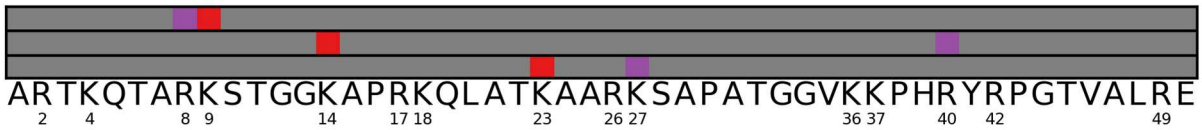

1 Ac – 2 Me

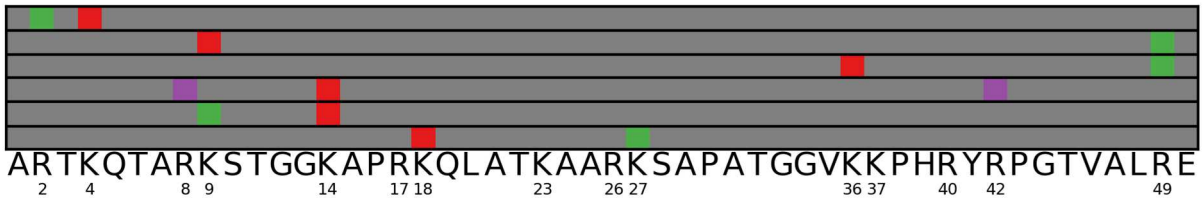

■ Acetylation
 ■ Mono-Methylation
 ■ Di-Methylation
 ■ Tri-Methylation

# DMSO-treated Proteoforms

1 Ac – 3 Me

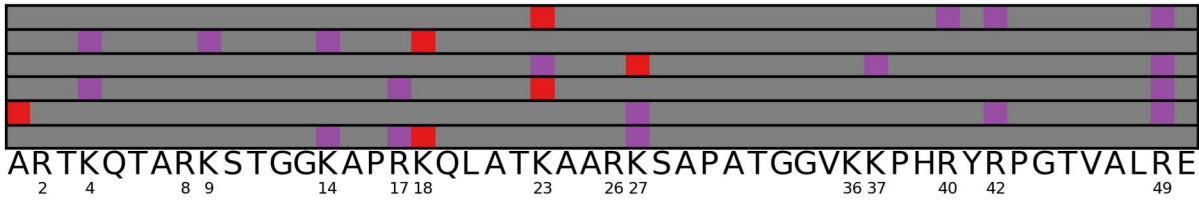

1 Ac – 4 Me

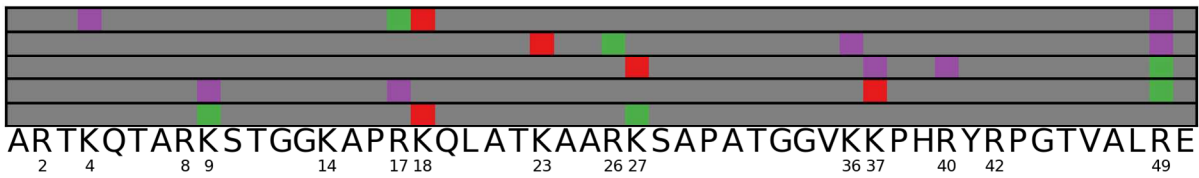

1 Ac – 5 Me

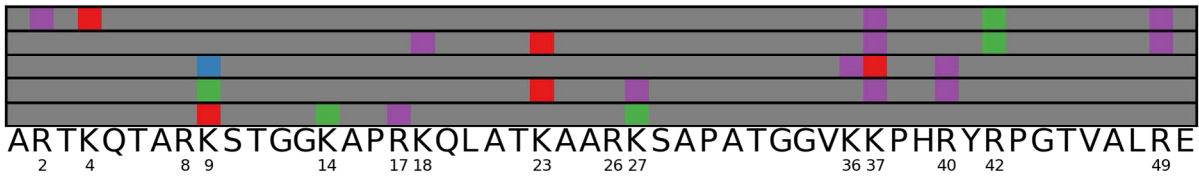

1 Ac – 6 Me

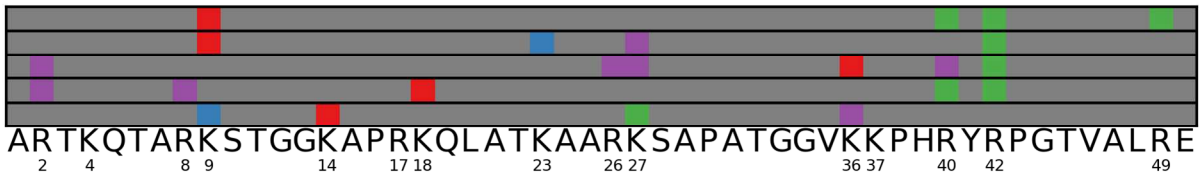

1 Ac – 7 Me

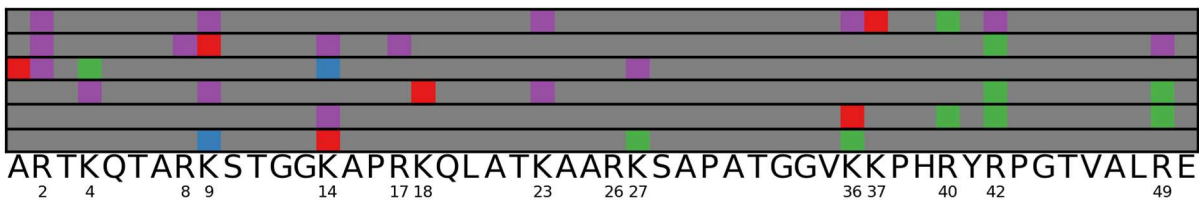

■ Acetylation
 ■ Mono-Methylation
 ■ Di-Methylation
 ■ Tri-Methylation

# DMSO-treated Proteoforms

2 Ac – 0 Me

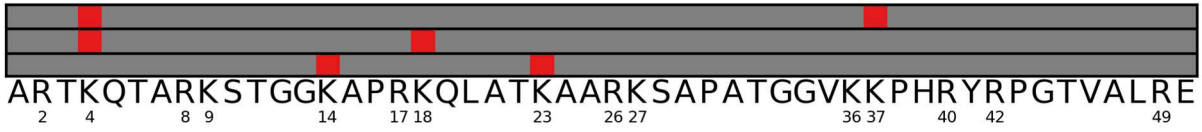

2 Ac – 1 Me

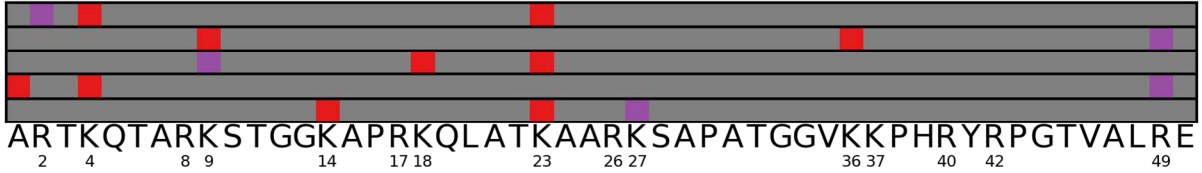

2 Ac – 2 Me

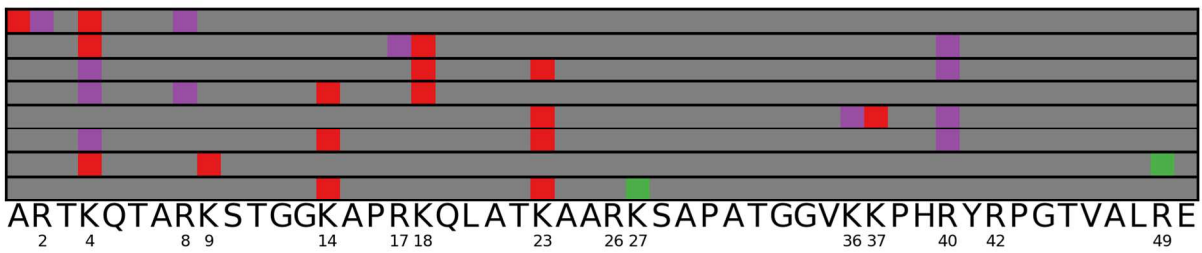

2 Ac – 3 Me

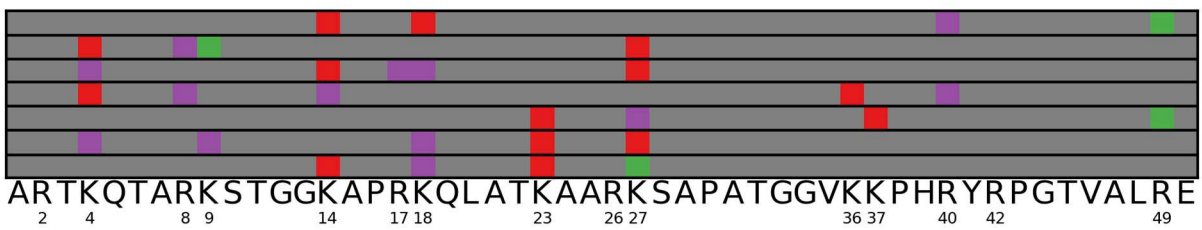

2 Ac – 4 Me

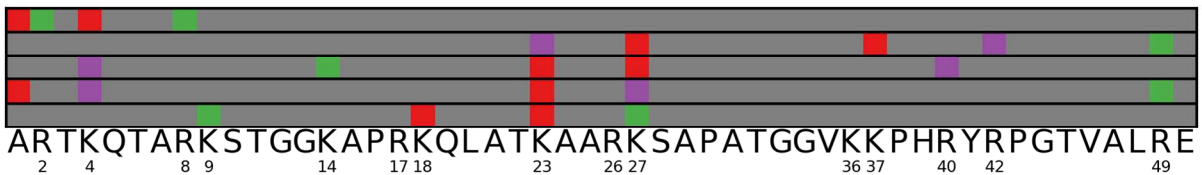

■ Acetylation
 ■ Mono-Methylation
 ■ Di-Methylation
 ■ Tri-Methylation

# DMSO-treated Proteoforms

2 Ac – 5 Me

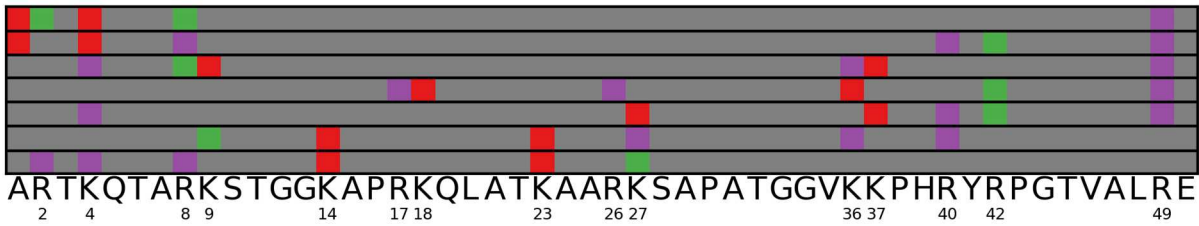

2 Ac – 6 Me

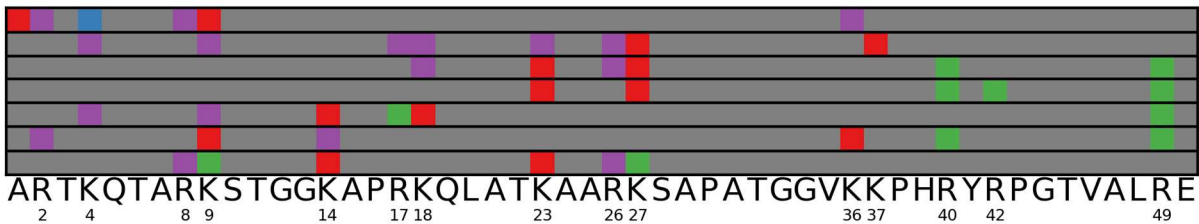

3 Ac – 2 Me

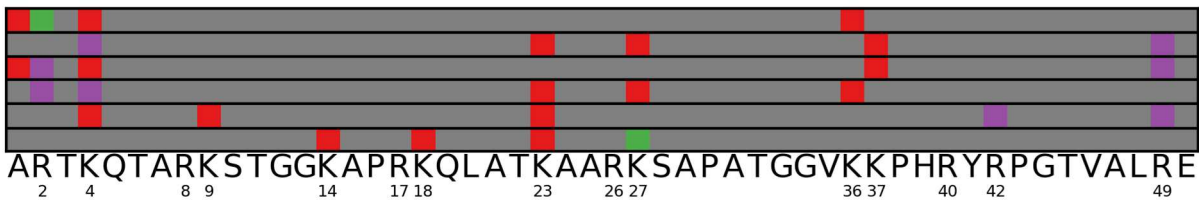

3 Ac – 3 Me

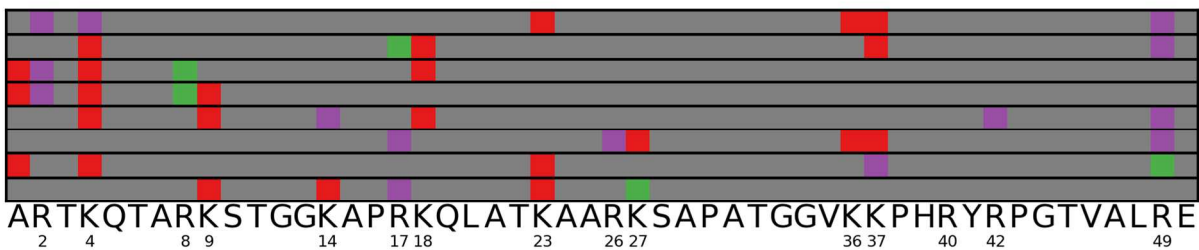

■ Acetylation
 ■ Mono-Methylation
 ■ Di-Methylation
 ■ Tri-Methylation

# DMSO-treated Proteoforms

3 Ac – 4 Me

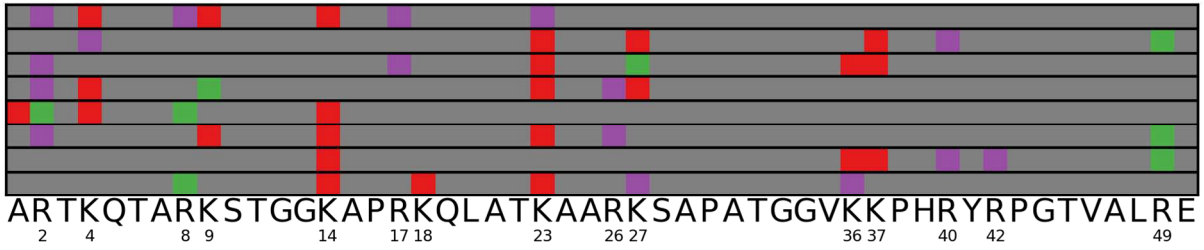

3 Ac – 5 Me

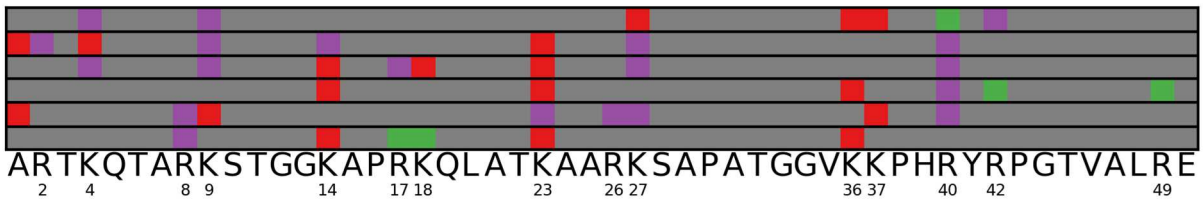

Red Acetylation Purple Mono-Methylation Green Di-Methylation Blue Tri-Methylation
